# Supplementary material for: A magnetic graphene hybrid functionalized with beta-cyclodextrins for fast and efficient removal of organic dyes
Source: Royal Society of Chemistry journal article supplement (doi:10.1039/c4ta00753k), 2014-04-23
Supplement: c4ta00753k1.pdf [file c4ta00753k1.pdf]

## **Magnetic graphene hybrid functionalized by beta-cyclodextrins for fast and efficient removal of organic dyes**

Xiaodong Liu<sup>1,2,§</sup>, Liang Yan<sup>1,§,\*</sup>, Wenyan Yin<sup>1</sup>, Liangjun Zhou<sup>1,3</sup>, Gan Tian<sup>1</sup>, Junxin Shi<sup>1</sup>,  
Zhiyong Yang<sup>4</sup>, Debao Xiao<sup>2,\*</sup>, Zhanjun Gu<sup>1,\*</sup> and Yuliang Zhao<sup>1,\*</sup>

<sup>1</sup>CAS Key Laboratory for Biomedical Effects of Nanomaterials and Nanosafety, Institute of High Energy Physics, Chinese Academy of Sciences, Beijing 100049, China

<sup>2</sup>Hebei Key Laboratory of Applied Chemistry, School of Environmental and Chemical Engineering, Yanshan University, Qinhuangdao 066004, China

<sup>3</sup>College of Materials Science and Opto-Electronic Technology, University of Chinese Academy of Sciences, Beijing 100049, China

<sup>4</sup>School of Chemistry and Chemical Engineering, University of Chinese Academy of Sciences, Beijing 100049, China

\*E-mails:      yanliang@ihep.ac.cn,      zjgu@ihep.ac.cn;      debao.xiao@ysu.edu.cn;  
zhaoyuliang@ihep.ac.cn

**Key words:** Graphene, magnetic hybrid,  $\beta$ -cyclodextrin, adsorption, organic dyes

## Supplementary Figures

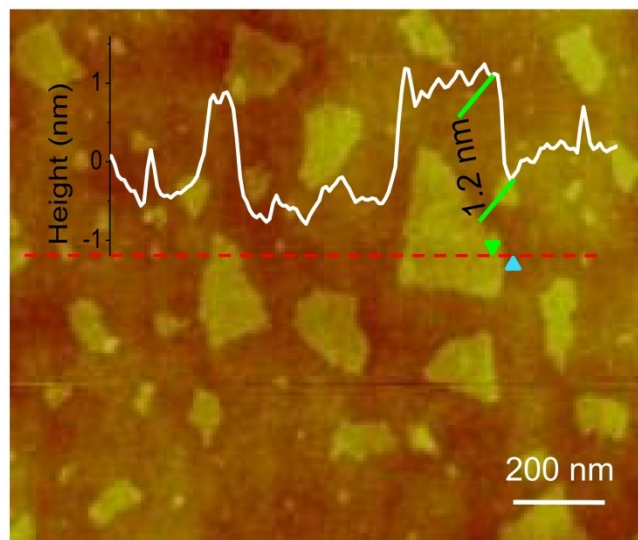

**Figure S1.** AFM image of GO.

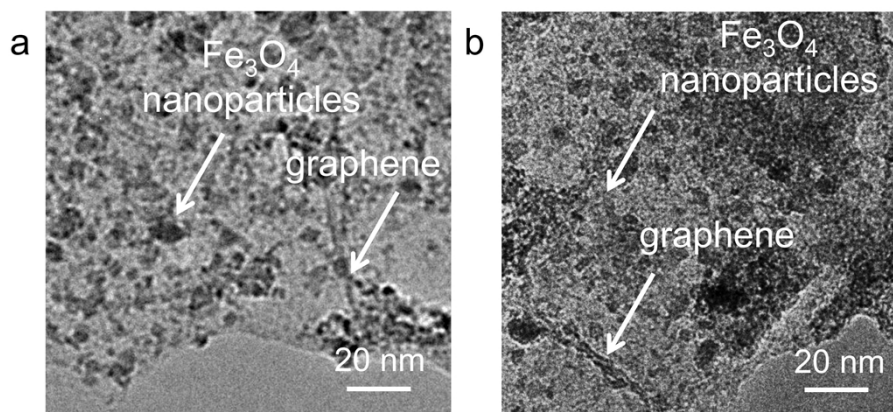

**Figure S2.** TEM images of mGO hybrid (a) and mGO- $\beta$ -CD hybrid (b), respectively. In the images, wrinkled GO nanosheets are observed and Fe<sub>3</sub>O<sub>4</sub> nanoparticles were loaded onto the graphene surface before (a) and after (b) attaching mGO with  $\beta$ -CDs.

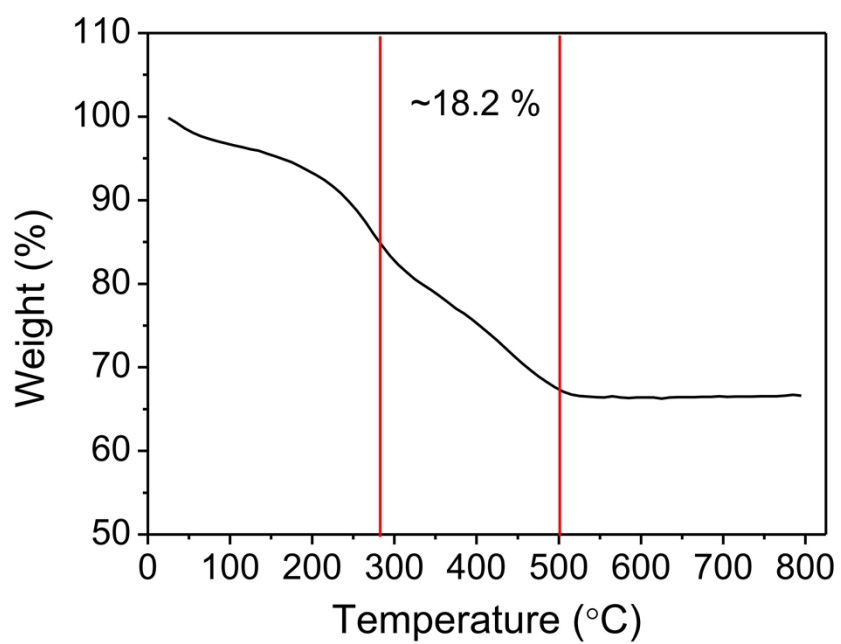

**Figure S3.** TGA of mGO-β-CD hybrid.

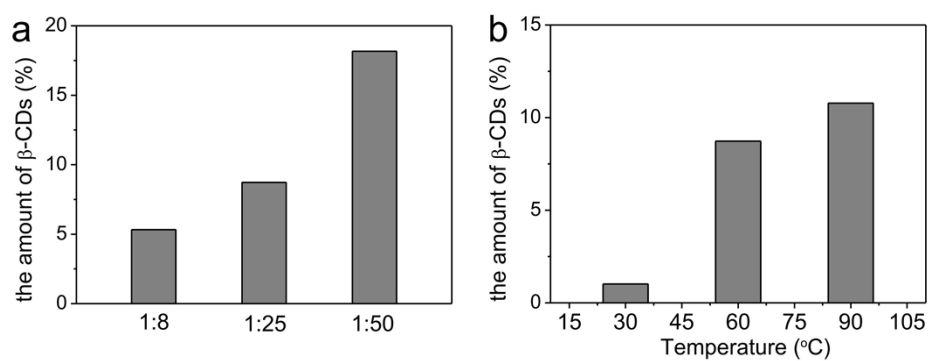

Figure S4. The amount of  $\beta$ -CDs with increasing the initial concentration of  $\beta$ -CDs and temperature. The results indicate that  $\beta$ -CDs are successfully bounded to mGO under the reaction conditions and the quantity of  $\beta$ -CD on mGO- $\beta$ -CD is related to the initial concentration of  $\beta$ -CD and temperature.

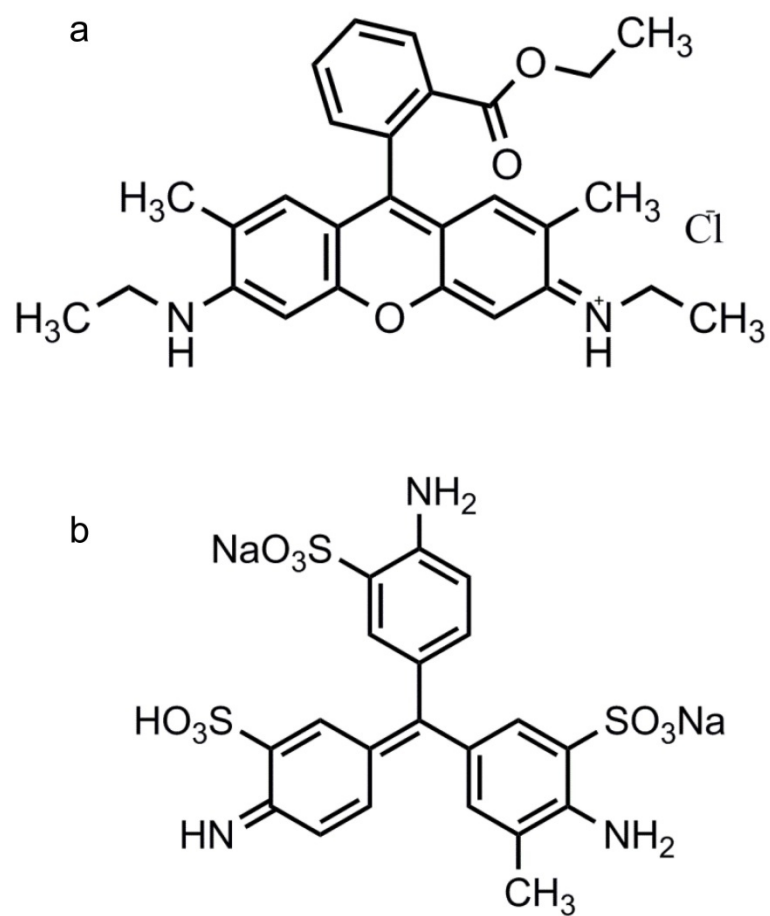

**Figure S5.** The chemical structures of R6G (a) and AF (b).

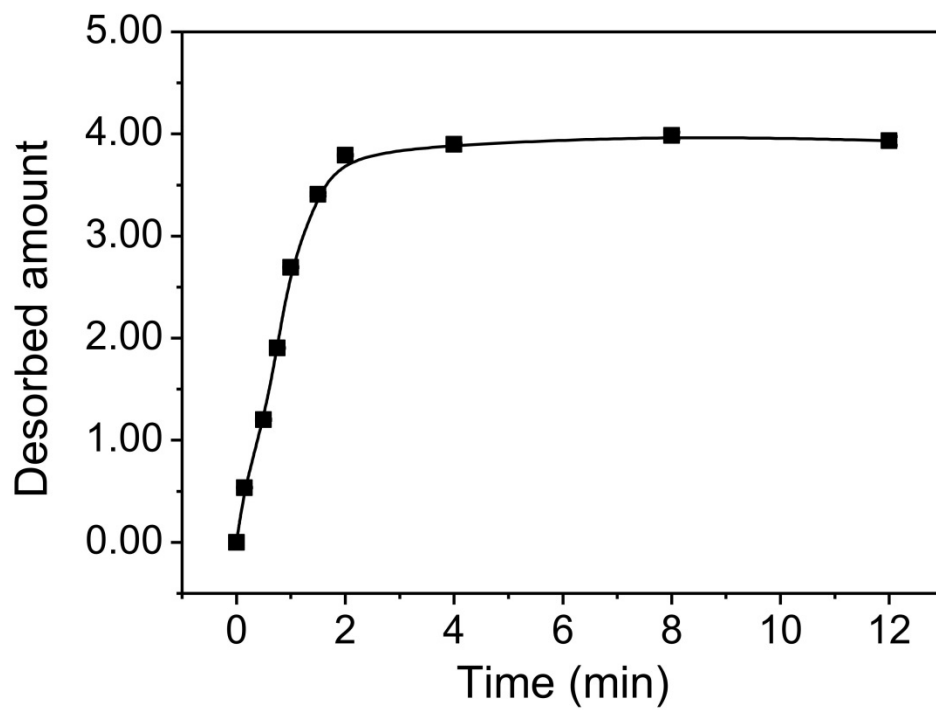

**Figure S6.** Effect of desorption time on the desorbed amount of R6G by mGO-β-CD hybrid.

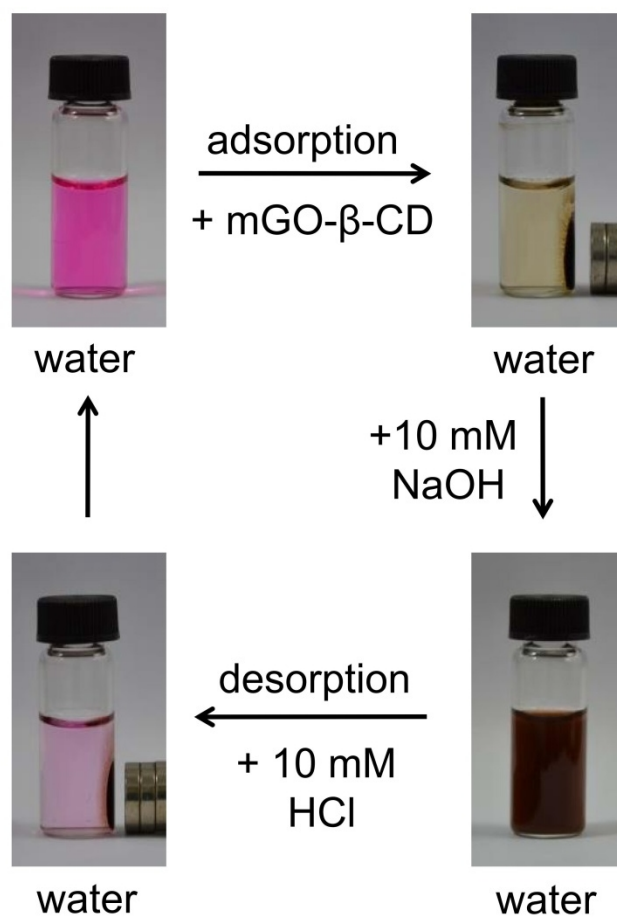

**Figure S7.** A schematic of the procedure for the recyclability study using the mGO-β-CD hybrid as the adsorbent.
